# Supplementary material
Source: ML conference proceedings conference paper supplement (https://www.ecva.net/papers/eccv_2020/papers_ECCV/html/123730069_ECCV_2020_paper.php)
Supplement: Supplementary file 1 [file 123730069-supp.pdf]

# Supplementary Material: Table Structure Recognition using Top-Down and Bottom-Up Cues

Sachin Raja, Ajoy Mondal, and C V Jawahar

Center for Visual Information Technology,  
International Institute of Information Technology, Hyderabad, India  
sachinraja13@gmail.com, {ajoy.mondal,jawahar}@iiit.ac.in

## 1 Organization

We organize our supplementary paper in the following manner:

- Section 2 contains additional details about our methodology including the post-processing step to obtain the final XML output.
- Section 3.1 contains information about the datasets used for experiments and explains the ground-truth unification process.
- Section 3.2 briefly explains various previously published methods in the space of table structure recognition including the input modalities used for predictions.
- Section 3.3 talks about the very specific details of implementation for training our model.
- Section 3.4 explains the evaluation method in greater detail which will be useful for reproducing our results. It explains various assumptions and reasons for choosing the specific metrics.
- Section 3.5 lists out various challenges encountered for evaluating and comparing our method with the existing ones, and also talks about the ways in which we handled them in our work.
- Section 4 presents additional quantitative and qualitative results for a detailed analysis.

## 2 TabStruct-Net

Our TabStruct-Net is a data-driven and an end-to-end trainable architecture for the prediction of table structure from a given table image, that combines top-down and bottom-up methods. As a first step, the input table image is broken down into individual cells using the cell detection network of the TabStruct-Net. We call this as the top-down step of the process. After detecting individual cells, the next step is to obtain the entire table structure by building relevant row and column associations between the detected cells. This is done using the structure recognition network of the TabStruct-Net and we call this as the bottom-up step of the process.

## 2.1 Post-processing to Get XML Output

After the cell bounding boxes along with the row and column adjacency matrices are obtained, an XML file is generated using an heuristic based algorithm. It works as follows:

- For row assignments, sort all bounding boxes by their  $start_y$  coordinates, and initialize a row belonging list for every cell.
- Assign a row belonging index (starting from 0) to the cell  $c_i$  and assign the same row index to all other cells that are connected to  $c_i$  in the row adjacency matrix.
- Increment the row index and repeat the above step until all the cells are assigned at least one row belonging index.
- For each cell,  $SR$  is the minimum of indexes in the row belonging list, and  $ER$  is the maximum of indexes in the row belonging list.
- Similarly, for column assignments, sort all bounding boxes by their  $start_x$  coordinates, and initialize a column belonging list for every cell.
- Assign a column belonging index (starting from 0) to the cell  $c_i$  and assign the same column index to all other cells that are connected to  $c_i$  in the column adjacency matrix.
- Increment the column index and repeat the above step until all the cells are assigned at least one column belonging index.
- For each cell,  $SC$  is the minimum of indexes in the row belonging list, and  $EC$  is the maximum of indexes in the column belonging list.

We use Tesseract [43] to extract the content of every predicted cell. Once  $SR$ ,  $ER$ ,  $SC$  and  $EC$  values (referred to as cell spanning values) and its content are obtained for every predicted cell, an XML file is created with these cell spanning values along with bounding box coordinates (top-left and bottom-right of the cell) and its content.

## 3 Experiments

### 3.1 Dataset

We use various benchmark table structure recognition datasets — SciTSR [14], SciTSR-COMP [14], ICDAR-2013 table recognition [18], ICDAR-2019 cTDaR archival [19], UNLV [28], Marmot extended [12], TableBank [11] and PubTabNet [13] datasets for extracting structure information of tables. Statistics of these datasets are listed in Table 1 (main paper).

Our Tabstruct-Net makes an assumption that all cells belonging to the same column are aligned with respect to x coordinates and cells belonging to the same row are aligned with respect to y coordinates. SciTSR[14], SciTSR-COMP [14] and ICDAR-2013 [18] datasets have ground truth bounding boxes at the level of cell’s content (box is the smallest rectangular block that encapsulates the cell’s content). To handle this, we expand the bounding boxes of every cell in a row and column to get maximum sized content-level box in a particular row and column.



|                    | hypermarkets | supermarkets      | others |                   |      |
|--------------------|--------------|-------------------|--------|-------------------|------|
|                    | 1996         | change since 1988 | 1996   | change since 1990 | 1996 |
| Austria            | 12           | +2                | 52     | +17               | 36   |
| Belgium/Luxembourg | 26           | -                 | 78     | +5                | 24   |
| Denmark            | 17           | +6                | 89     | +8                | 24   |
| Finland            | 23           | +6                | 81     | +7                | 27   |
| France             | 31           | +10               | 44     | -                 | 5    |
| Germany            | 24           | +7                | 82     | +7                | 24   |
| Greece             | 8            | +3                | 81     | +6                | 44   |
| Ireland            | 12           | +6                | 41     | +6                | 47   |
| Italy              | 13           | +11               | 39     | +6                | 48   |
| Netherlands        | 8            | +3                | 82     | +7                | 13   |
| Portugal           | 42           | +10               | 28     | +10               | 30   |
| Spain              | 24           | +27               | 25     | +5                | 31   |
| Sweden             | 13           | +6                | 64     | +8                | 23   |
| UK                 | 45           | +26               | 42     | +2                | 13   |

| Substance         | Frequency of substance abuse |                  |                  |       |
|-------------------|------------------------------|------------------|------------------|-------|
|                   | In the last month            | In the last year | More than a year | Never |
|                   |                              |                  |                  |       |
| Cannabis          | 9.6%                         | 4.0%             | 6.3%             | 80.1% |
| Heroin            | 2.7%                         | 1.6%             | 4.1%             | 81.6% |
| Cocaine           | 2.1%                         | 0.9%             | 3.0%             | 94.0% |
| Anabolic steroids | 2.1%                         | 0.2%             | 0.7%             | 97.0% |
| Magic mushrooms   | 2.1%                         | 0.5%             | 1.1%             | 96.3% |
| Heroin            | 0.5%                         | 0.0%             | 0.5%             | 99.0% |
| Amphetamines      | 2.5%                         | 0.7%             | 0.7%             | 96.1% |
| Ketamine          | 2.1%                         | 0.0%             | 0.5%             | 97.4% |
| LSI               | 2.3%                         | 0.0%             | 1.4%             | 96.4% |
| Cocaine           | 4.4%                         | 1.6%             | 1.8%             | 92.2% |
| GHB               | 1.1%                         | 0.0%             | 0.0%             | 98.9% |
| Tranquillisers    | 3.4%                         | 1.4%             | 1.8%             | 93.4% |
| Ritalin           | 1.1%                         | 0.0%             | 0.0%             | 98.9% |

| Category           | Age-related death rate |                 |          |                 | Undeclared death rate |                 |          |                 |
|--------------------|------------------------|-----------------|----------|-----------------|-----------------------|-----------------|----------|-----------------|
|                    | 2005                   |                 | 2011     |                 | 2005                  |                 | 2011     |                 |
|                    | Estimate               | Margin of error | Estimate | Margin of error | Estimate              | Margin of error | Estimate | Margin of error |
| All people         | 18.8                   | 0.3             | 18.7     | 0.3             | 18.7                  | 0.3             | 18.7     | 0.3             |
| Male               | 17.9                   | 0.4             | 17.8     | 0.4             | 17.8                  | 0.4             | 17.8     | 0.4             |
| Female             | 19.6                   | 0.3             | 19.6     | 0.3             | 19.6                  | 0.3             | 19.6     | 0.3             |
| White people       | 17.9                   | 0.4             | 17.8     | 0.4             | 17.8                  | 0.4             | 17.8     | 0.4             |
| Black people       | 18.1                   | 0.4             | 17.8     | 0.4             | 17.8                  | 0.4             | 17.8     | 0.4             |
| Hispanic people    | 18.8                   | 0.3             | 18.7     | 0.3             | 18.7                  | 0.3             | 18.7     | 0.3             |
| Native born        | 18.8                   | 0.3             | 18.7     | 0.3             | 18.7                  | 0.3             | 18.7     | 0.3             |
| Foreign born       | 18.8                   | 0.3             | 18.7     | 0.3             | 18.7                  | 0.3             | 18.7     | 0.3             |
| Non-Hispanic       | 18.8                   | 0.3             | 18.7     | 0.3             | 18.7                  | 0.3             | 18.7     | 0.3             |
| Hispanic or Latino | 18.8                   | 0.3             | 18.7     | 0.3             | 18.7                  | 0.3             | 18.7     | 0.3             |

**Fig. 1.** Ground truth unification. content-level bounding boxes are given in ground truth as shown in **First Row**. We make content-level bounding boxes into cell-level bounding boxes as shown in **Second Row**.

### 3.2 Baseline Methods

We compare the performance of our TabStruct-Net against seven following benchmark methods.

**DeepDeSRT [7]:** This method leverages semantic segmentation approach to localize each row and column from the table image. This method outputs table as a grid-like structure and fails to identify multiple row and multiple column spanning cells. Since no code is available, we implement our own version of this method. Since this method works by predicting every row and column, the SciTSR training dataset is pre-processed to obtain row and column level coordinates before training.

**TableNet [12]:** This method uses semantic segmentation approach to extract table and column masks, and segments rows by identifying words present in different columns (extracted using Tesseract OCR [43]) that occur at the same horizontal level. For comparison against other methods, we directly use the results reported by the authors.

**GraphTSR [14]:** This method consists of edge-to-vertex and vertex-to-edge graph attention blocks to compute vertex and edge representations in a latent space, and finally classify each edge as ‘horizontal’, ‘vertical’ or ‘no-relation’. It uses absolute and relative positions of every cell extracted from the PDF to compute initial vertex and edge features.

**SPLERGE [10]:** This method comprises of two deep learning networks that perform splitting and merging operations in sequence to predict fine grid-like

table structure and to predict merged cells which span multiple rows/columns. Split method shows an improved performance when additional PDF extracted meta-features are provided along with the table image. For the split model (to obtain the basic grid of the table), authors pre-process the ground truth by maximizing the row and column separator regions without intersecting any non multiple row or column spanning cell. For the merge model (to identify cells that span multiple rows or columns), the authors prepare the ground truth by identifying grid elements that span multiple cells and set the merging probability in the respective directions. Further, for evaluating this method on ICDAR-2013 [18] dataset, the authors realized that merge method did not work with a good performance, and hence, introduced the following specific heuristics to merge cells instead:

- Merge cells where separators pass through text.
- Merge adjacent blank columns with cells that have been formed by merging many cells.
- Merge adjacent blank rows with content cells.
- Split columns that have a consistent white-space gap between vertically aligned text.

**DGCNN\* [9]:** Authors formulate the problem as a graph learning problem to predict whether every pair of words belongs to the same cell, row and/or column or not. Their architecture consists of a visual network, an interaction network and a classification network. For evaluation purposes, table image along with word-level bounding boxes is provided as inputs.

**Bi-directional GRU [15]:** Given the table image, this method uses two bi-directional GRUs to establish row and column boundaries in a context driven manner. This method however fails to localize multiple row and/or multiple column spanning cells.

**Image-to-Text [11]:** This method utilizes an Image-to-Markup model to predict a markup-like output of a given table image. It consists of a CNN based encoder to compute visual features and an LSTM based decoder to produce markup output.

### 3.3 Implementation Details

Our Tabstruct-Net model<sup>1</sup> has been trained and evaluated with table images scaled to a fixed size of  $1536 \times 1536$  while maintaining the original aspect ratio as the input. While training, cell-level bounding boxes along with row and column adjacency matrices (prepared from start-row, start-column, end-row and end-column indices) are used as the ground truth. We use NVIDIA TITAN X GPU with 12 GB memory for our experiments and a batch-size of 1. Instead of using

---

<sup>1</sup> Our code will be available publicly

$3 \times 3$  convolution on the output feature maps from the FPN, we use a dilated convolution with filter size of  $2 \times 2$  and dilation parameter of 2. Also, we use the ResNet-101 backbone that is pre-trained on MS-COCO [48] dataset. To compute region proposals, we use 0.5, 1 and 2 as the anchor scale and anchor box sizes of 8, 16, 32, 64 and 128. Further, for generation of the row/column adjacency matrices, we use 2400 as the maximum number of vertices keeping in mind dense tables. Since every input table may contain hundreds of table cells, training can be a time consuming process.

To achieve faster training, we employ a 2-stage training process. In the first step, we use 2014 anchors and 512 RoIs. With this setting, the model is able to learn high and low level features but resulted in a large number of false negatives. To combat this, network is trained with 3072 anchors and 2048 RoIs. This significantly reduces the number of false negatives. For the first step, we train a total of 30 epochs, for the first 8, we train all FPN and subsequent layers, for the next 15, we train FPN + last 4 layers of ResNet-101 and for the last 7 epochs, we train all the layers of the model. For the second step, we train a total of 10 epochs, for the first 3, we train all FPN and subsequent layers, for the next 4, we train FPN + last 4 layers of ResNet-101 and for the last 3 epochs, we train all the layers of the model. During both the stages, we use 0.001 as the learning rate, 0.9 as the momentum and 0.0001 as the weight decay regularisation.

### 3.4 Evaluation Measures

**Details of Evaluation Criteria:** For comparison against most of the existing methods, we use the precision, recall and F1 score [14,18,28]. Before evaluating performance of structure recognition, it is important to understand the specific cases in which detected cells are taken into consideration for structure recognition:

- We consider a detected cell to be a true positive if it overlaps with the ground truth cell bounding box is more than 0.5.
- During evaluation of structure recognition, cells that have no content (i.e., empty or blank cells) are discarded. It means that adjacency relations that involve a blank cell are not taken into consideration.

To evaluate the performance of structure recognition, adjacency relations between every cell (with content) are generated with their horizontal and vertical neighbors. This predicted relation list is then compared with the ground truth list to generate precision, recall and F1 measures.

As per [18], this method accounts for the standard evaluation measures for table structure recognition for the following reasons:

- It provides for a simple way to account for errors in the scenarios of complex table layouts containing blank cells, and cells that span multiple rows and/or columns.
- It accounts for evaluation of both physical as well as logical structure prediction methods as it is not dependent on the bounding box coordinates information.

Further, we present our results on both micro-averaged and macro-averaged precision, recall and F1 scores which are defined as following:

- **Micro-averaged:** In this case, the confusion matrix parameters are gathered across all the data points collectively in the test dataset to compute precision, recall and F1 scores.
- **Macro-averaged:** In this case, the confusion matrix parameters are gathered individually and then averaged across all the documents in the test dataset to compute precision, recall and F1 scores.

### 3.5 Experimental Setup

One major challenge in the comparison study with the existing methods is the inconsistent use of additional information (e.g., meta-features extracted from the PDFs [10], content-level bounding boxes from ground truths [12,14] and cell’s location features generated from synthetic dataset [9]).

For the unification of fair comparison for table structure recognition, we divide all inconsistencies into several levels - (i) inconsistency with respect to input modalities, (ii) inconsistency with respect to annotation levels, (iii) inconsistency with respect to representation of table structure, (iv) inconsistency with respect to evaluation methods, and (v) inconsistency with respect to way of computing evaluation scores.

***Inconsistency with respect to input modalities:*** Section 3.2 describes that many methods for table structure recognition work with table images alone [7,10,15], several other assume additional information in the form of meta-features or bounding boxes around every word or cell-content extracted from the PDFs [9,12,14]. This makes it difficult to compare these methods under a unified scenario. To take care of this problem, we define two different experimental setups - (a) **Setup-A (S-A)** where only table image is used as an input to the structure recognition model and (b) **Setup-B (S-B)** where table image along with additional meta-features such as low-level content bounding boxes are used as an input to the structure recognition model. We present our results under both the experimental setups for a thorough comparison of our work against most of the recent methods in this space. To achieve this, we train our model for cell detection as well as structure recognition collectively for S-A. For evaluation in S-B, instead of predicting cell bounding boxes from the image, we use the table image and the low-level bounding box information from OCR or ground truth to be able to directly and fairly compare our method.

***Inconsistency with respect to annotation levels:*** It is important to note that training of TabStruct-Net assumes cell-level bounding boxes in a way that all cells that (a) have the same *SR* indices having same *y1* coordinates, (b) have the same *SC* indices having same *x1* coordinates, (c) have the same *ER* indices having same *y2* coordinates, and (d) have the same *EC* indices having same *x2* coordinates. This assumption is necessary for our alignment loss

function to work properly. However, different datasets for physical table structure recognition have ground truth annotations defined in different ways. UNLV and ICDAR-2019 archival datasets have ground truth annotated at the cell-level. SciTSR[14] and ICDAR-2013 [18] datasets have ground truth annotation defined at the content-level (cells’ bounding box is the smallest rectangle that covers entire content of the cell). To be able to use those for training, we pre-process the ground-truth to obtain cell-level bounding boxes (as explained in Section 3.1). Please note that this pre-processing step is only done for the training process. Similarly, ground-truth bounding boxes of the synthetic dataset proposed in [9] are provided at the word-level. To obtain cell-level bounding boxes, we use the ground-truth cell adjacency matrix and word-level bounding boxes to obtain content-level bounding boxes. During the testing time in S-A, however, to compute if a detected cell is a true positive, we use the original ground-truth bounding boxes (either at cell-level or content-level), and not the pre-processed ones. Similarly while testing in S-B, we use the original content-level or cell-level bounding boxes as the additional input instead of the pre-processed ones. This ensures consistency while comparing our methods against previously published ones.

***Inconsistency with respect to representation of table structure:*** We broadly classify table structure methods into two categories - (a) physical structure predicting methods that predict cell-level bounding boxes along with their associations [7,10,15] and (b) logical structure predicting methods [9,11,12,14] that predict only cell associations. In our work, we standardize our representation as described in Section 3.5, which allows us to directly compare methods in both the experimental setups. To compare the results of Tabstruct-Net on logical structure prediction, we generate the mark-up string from the post-processed XML output of Tabstruct-Net in the same format as TableBank [11] and PubTabNet [13] by extracting only the structure without cells’ coordinates and content.

***Inconsistency with respect to evaluation methods:*** While most of the previously published methods for table structure recognition use precision, recall and F1 scores as described in [18], there are some inconsistencies in this aspect as well. In [9], authors use true positive rate (TPR), false positive rate (FPR) and absolute accuracy on the predicted adjacency matrix to compute performance. In order to standardize evaluation with [9], we infer neighboring cell relations from their output to ensure consistency. Further, [11] use BLEU scores to compare their output with the ground truth. Since our method generates an XML output from the model’s predictions, we bring our output to the same format as [11] to ensure a direct and fair comparison on the TableBank dataset [11].

***Inconsistency with respect to way of computing evaluation scores:*** To fairly compare Tabstruct-Net against previous methods, we list both micro as well as macro (document) - averaged results on all the test datasets. However, it is important to note that for TableBank [11] and PubTabNet [13] datasets, where

we evaluate our results on the markup output of the model, we only consider macro(document)-averaged results.

## 4 Results on Table Structure Recognition

### 4.1 Micro-averaged Results

Tables 1-4 show the micro-averaged results of various methods for structure recognition on multiple datasets. From the tables, it can be observed that our method outperforms previously published works under multiple kinds of experimental settings. Further, it is important to note that the tables use an IoU threshold of 0.5 to identify true positive cells for experiment setup S-A. We also show the precision, recall and F1 measures on various IoU thresholds to better interpret the performance of the cell detection module of Tabstruct-Net.

| Method                  | Training             |         | Exp. Setup | P↑           | R↑           | F1↑          |
|-------------------------|----------------------|---------|------------|--------------|--------------|--------------|
|                         | Dataset              | #Images |            |              |              |              |
| DeepDesRT [7]           | ICDAR-2013-partial   | 0.124K  | S-A        | 0.959        | 0.874        | 0.914        |
| SPLERGE [10]            | ICDAR-2013-partial   | 0.124K  | S-A        | 0.917        | 0.911        | 0.914        |
| Bi-directional GRU [15] | ICDAR-2013-partial   | 0.124K  | S-A        | <b>0.969</b> | <b>0.901</b> | <b>0.934</b> |
| TabStruct-Net (our)     | ICDAR-2013-partial   | 0.124K  | S-A        | 0.928        | 0.903        | 0.915        |
| TabStruct-Net (our)     | SciTSR               | 12.124K | S-A        | 0.930        | 0.908        | 0.919        |
|                         | + ICDAR-2013-partial |         |            |              |              |              |
| TableNet [12]           | Marmot extended      | 1.016K  | S-B        | 0.931        | 0.900        | 0.915        |
| GraphTSR [14]           | SciTSR               | 12.124K | S-B        | 0.854        | 0.891        | 0.872        |
|                         | + ICDAR-2013-partial |         |            |              |              |              |
| DGCNN [9]               | SciTSR               | 12.124K | S-B        | 0.986        | 0.990        | 0.988        |
|                         | + ICDAR-2013-partial |         |            |              |              |              |
| TabStruct-Net (our)     | ICDAR-2013-partial   | 0.124K  | S-B        | <b>0.991</b> | 0.989        | 0.990        |
| TabStruct-Net (our)     | SciTSR               | 12.124K | S-B        | <b>0.991</b> | <b>0.993</b> | <b>0.992</b> |
|                         | + ICDAR-2013-partial |         |            |              |              |              |

**Table 1.** Comparison of results for physical structure recognition on ICDAR-2013-partial dataset. **P:** indicates precision, **R:** indicates recall, **F1:** indicates F1 Score and **#Images:** indicates number of table images in the training set.

| Method              | Training       |         | Exp. Setup | P↑           | R↑           | F1↑          |
|---------------------|----------------|---------|------------|--------------|--------------|--------------|
|                     | Dataset        | #Images |            |              |              |              |
| NLPR-PAL [19]       | CTDaR          | 0.6K    | S-A        | 0.720        | 0.770        | 0.745        |
| DGCNN [9]           | CTDaR          | 0.6K    | S-A        | 0.785        | 0.751        | 0.768        |
| DGCNN [9]           | SciTSR         | 12.0K   | S-A        | 0.552        | 0.519        | 0.535        |
| DGCNN [9]           | CTDaR + SciTSR | 12.6K   | S-A        | 0.803        | 0.778        | 0.790        |
| SPLERGE [10]        | CTDaR          | 0.6K    | S-A        | 0.774        | 0.783        | 0.778        |
| SPLERGE [10]        | SciTSR         | 12.0K   | S-A        | 0.559        | 0.572        | 0.565        |
| SPLERGE [10]        | CTDaR + SciTSR | 12.6K   | S-A        | 0.792        | 0.800        | 0.796        |
| Tabstruct-Net (our) | CTDaR          | 0.6K    | S-A        | 0.803        | 0.768        | 0.785        |
| Tabstruct-Net (our) | SciTSR         | 12.0K   | S-A        | 0.595        | 0.572        | 0.583        |
| Tabstruct-Net (our) | CTDaR + SciTSR | 12.6K   | S-A        | <b>0.822</b> | <b>0.787</b> | <b>0.804</b> |

**Table 2.** Comparison of results for physical structure recognition on ICDAR-2019 (CTDaR) archival dataset. For comparison against DGCNN[9], we use the cell bounding boxes detected from Tabstruct-Net for a fair comparison. **P**: indicates precision, **R**: indicates recall, **F1**: indicates F1 Score and **#Images**: indicates number of table images in the training set.

| Method              | Exp. Setup | P↑           | R↑           | F1↑          |
|---------------------|------------|--------------|--------------|--------------|
| DeepDeSRT [7]       | S-A        | 0.554        | 0.529        | 0.541        |
| SPLERGE [10]        | S-A        | 0.795        | 0.776        | 0.785        |
| TabStruct-Net (our) | S-A        | <b>0.849</b> | <b>0.828</b> | <b>0.839</b> |
| GraphTSR [14]       | S-B        | 0.763        | 0.786        | 0.774        |
| DGCNN[9]            | S-B        | 0.921        | 0.898        | 0.909        |
| TabStruct-Net (our) | S-B        | <b>0.992</b> | <b>0.994</b> | <b>0.993</b> |

**Table 3.** Comparison of results for physical structure recognition on UNLV-partial dataset. **P**: indicates precision, **R**: indicates recall, **F1**: indicates F1 Score. All models are trained on SciTSR and fine-tuned on UNLV-partial datasets.

| Method              | Exp. Setup | Evaluation on |              |              |              |              |              |
|---------------------|------------|---------------|--------------|--------------|--------------|--------------|--------------|
|                     |            | SciTSR        |              |              | SciTSR-COMP  |              |              |
|                     |            | P↑            | R↑           | F1↑          | P↑           | R↑           | F1↑          |
| DeepDeSRT [7]       | S-A        | 0.906         | 0.887        | 0.890        | 0.863        | 0.831        | 0.846        |
| SPLERGE [10]        | S-A        | 0.922         | <b>0.915</b> | 0.918        | <b>0.911</b> | 0.880        | <b>0.895</b> |
| Tabstruct-Net (our) | S-A        | <b>0.927</b>  | 0.913        | <b>0.920</b> | 0.909        | <b>0.882</b> | <b>0.895</b> |
| GraphTSR [14]       | S-B        | 0.959         | 0.948        | 0.953        | 0.964        | 0.945        | 0.955        |
| DGCNN [9]           | S-B        | 0.970         | 0.981        | 0.976        | 0.963        | 0.974        | 0.969        |
| Tabstruct-Net (our) | S-B        | <b>0.989</b>  | <b>0.993</b> | <b>0.991</b> | <b>0.981</b> | <b>0.987</b> | <b>0.984</b> |

**Table 4.** Comparison of results for physical structure recognition on SciTSR and SciTSR-COMP datasets. **P**: indicates precision, **R**: indicates recall, **F1**: indicates F1 Score. All the models are trained on SciTSR dataset.

## 4.2 Average Results on Markup Output

Tables 5-6 present compare our results for logical structure prediction from the table image on TableBank and PubTabNet dataset, respectively. The scores are obtained by averaging the score for every table across all the tables in the evaluation dataset. From the tables, it can be inferred that despite trained with a much smaller set of data, our model achieves better performance than [13]. Direct comparison, however would not be fair because of the use of different input modalities for training.

| Method              | Training Set |       |          | Experimental Setup | BLEU $\uparrow$ |              |              |
|---------------------|--------------|-------|----------|--------------------|-----------------|--------------|--------------|
|                     | Dataset      | Type  | #Images  |                    | Word            | Latex        | Both         |
| Image-to-Text [11]  | TableBank    | Word  | 55.866K  | S-A                | 0.751           | 0.673        | 0.7138       |
| Image-to-Text [11]  | TableBank    | Latex | 87.597K  | S-A                | 0.405           | 0.765        | 0.582        |
| Image-to-Text [11]  | TableBank    | Both  | 144.493K | S-A                | 0.712           | 0.765        | 0.738        |
| TabStruct-Net (our) | SciTSR       | Image | 12K      | S-A                | <b>0.914</b>    | <b>0.937</b> | <b>0.916</b> |

**Table 5.** Comparison of results for logical structure recognition on TableBank dataset.

| Method              | Experimental Setup | Training Dataset | #Images | TEDS $\uparrow$ |
|---------------------|--------------------|------------------|---------|-----------------|
| Acrobat Pro [13]    | S-A                | -                | -       | 0.537           |
| WYGIWYS [13]        | S-A                | PubTabNet        | 399K    | 0.786           |
| EDD [13]            | S-A                | PubTabNet        | 399K    | 0.883           |
| TabStruct-Net (our) | S-A                | SciTSR [14]      | 12K     | <b>0.901</b>    |

**Table 6.** Comparison of results for logical structure recognition on PubTabNet dataset [13]. **TEDS:** indicates averaged tree edit distance based similarity [13].

We present our results on the output XML file that contains — (a) bounding box coordinates, (b) start and end row indices, (c) start and end column indices, and (d) content for every predicted cell given the table image. To evaluate our method, we compare this XML against the ground-truth prepared in the same format using BLEU, CIDRR and ROUGE scores as presented in Table 7. The table also compares our results against DGCNN [?] when cells detected from Tabstruct-Net are provided as the input to their model.



| Training Set                | Evaluation Set     | Model         | BLEU $\uparrow$ | CIDEr $\uparrow$ | ROUGE $\uparrow$ |
|-----------------------------|--------------------|---------------|-----------------|------------------|------------------|
| SciTSR                      | SciTSR             | DGCNN         | 0.774           | 0.8              | 0.782            |
|                             |                    | TabStruct-net | 0.833           | 0.848            | 0.839            |
| SciTSR                      | SciTSR-COMP        | DGCNN         | 0.769           | 0.795            | 0.774            |
|                             |                    | TabStruct-net | 0.826           | 0.837            | 0.830            |
| SciTSR + UNLV-partial       | UNLV-partial       | DGCNN         | 0.721           | 0.744            | 0.729            |
|                             |                    | TabStruct-net | 0.804           | 0.826            | 0.813            |
| SciTSR                      | ICDAR-2013         | DGCNN         | 0.756           | 0.773            | 0.762            |
|                             |                    | TabStruct-net | 0.815           | 0.831            | 0.821            |
| SciTSR + ICDAR-2013-partial | ICDAR-2013-partial | DGCNN         | 0.772           | 0.801            | 0.78             |
|                             |                    | TabStruct-net | 0.829           | 0.845            | 0.834            |

**Table 7.** Results comparison of various methods for table structure recognition on various datasets.

### 4.3 Macro-Averaged Results

Tables 8-12 show the macro-averaged results of various methods for structure recognition on multiple datasets. From the tables, it can be observed that our method outperforms previously published works under multiple kinds of experimental settings. Further, it is important to note that the tables use an IoU threshold of 0.5 to identify true positive cells for experiment setup S-A. It can be inferred from the tables that the macro-averaged numbers follow the same trend as the micro-averaged results.

| Method              | Training        |         | Experimental Setup | P $\uparrow$ | R $\uparrow$ | F1 $\uparrow$ |
|---------------------|-----------------|---------|--------------------|--------------|--------------|---------------|
|                     | Dataset         | #Images |                    |              |              |               |
| DeepDesRT [7]       | SciTSR          | 12K     | S-A                | 0.603        | 0.591        | 0.597         |
| SPLERGE [10]        | Private [10]    | 83K     | S-A                | <b>0.914</b> | <b>0.897</b> | <b>0.905</b>  |
| Tabstruct-Net (our) | SciTSR          | 12K     | S-A                | 0.883        | 0.871        | 0.877         |
| TableNet [12]       | Marmot Extended | 1K      | S-B                | -            | -            | -             |
| GraphTSR [14]       | SciTSR          | 12K     | S-B                | 0.819        | 0.855        | 0.837         |
| SPLERGE [10]        | Private [10]    | 83K     | S-B                | 0.932        | 0.917        | 0.924         |
| DGCNN [9]           | SciTSR          | 12K     | S-B                | 0.959        | 0.971        | 0.965         |
| Tabstruct-Net (our) | SciTSR          | 12K     | S-B                | <b>0.961</b> | <b>0.973</b> | <b>0.967</b>  |

**Table 8.** Comparison of results for physical structure recognition on ICDAR-2013 dataset. **P**: indicates precision, **R**: indicates recall, **F1**: indicates F1 Score and **#Images**: indicates number of table images in the training set. SPLERGE [10] is the **best performing model** (with post-processing) on ICDAR-2013 dataset in **S-A**. Tabstruct-Net is the **best performing model** on ICDAR-2013 dataset in **S-B**.

| Method                  | Training                       |         | Exp.<br>Setup | P↑           | R↑           | F1↑          |
|-------------------------|--------------------------------|---------|---------------|--------------|--------------|--------------|
|                         | Dataset                        | #Images |               |              |              |              |
| DeepDesRT [7]           | ICDAR-2013-partial             | 0.124K  | S-A           | 0.853        | 0.795        | 0.823        |
| Bi-directional GRU [15] | ICDAR-2013-partial             | 0.124K  | S-A           | -            | -            | -            |
| TabStruct-Net (our)     | ICDAR-2013-partial             | 0.124K  | S-A           | 0.907        | 0.889        | 0.898        |
| TabStruct-Net (our)     | SciTSR<br>+ ICDAR-2013-partial | 12.124K | S-A           | <b>0.922</b> | <b>0.896</b> | <b>0.909</b> |
| TableNet [12]           | Marmot extended                | 1.016K  | S-B           | -            | -            | -            |
| GraphTSR [14]           | SciTSR                         | 12.124K | S-B           | 0.846        | 0.879        | 0.862        |
| DGCNN [9]               | + ICDAR-2013-partial           | 12.124K | S-B           | 0.978        | 0.984        | 0.981        |
|                         | SciTSR                         |         |               |              |              |              |
| TabStruct-Net (our)     | + ICDAR-2013-partial           | 12.124K | S-B           | <b>0.985</b> | 0.986        | 0.985        |
| TabStruct-Net (our)     | ICDAR-2013-partial             |         | S-B           | <b>0.985</b> | <b>0.989</b> | <b>0.987</b> |
| TabStruct-Net (our)     | SciTSR<br>+ ICDAR-2013-partial |         | S-B           | <b>0.985</b> | <b>0.989</b> | <b>0.987</b> |

**Table 9.** Comparison of results for physical structure recognition on ICDAR-2013-partial dataset. **P:** indicates precision, **R:** indicates recall, **F1:** indicates F1 Score and **#Images:** indicates number of table images in the training set. Tabstruct-Net is the **best performing model** on ICDAR-2013-partial dataset in both **S-A** and **S-B**.

| Method              | Training       |         | Exp.<br>Setup | P↑           | R↑           | F1↑          |
|---------------------|----------------|---------|---------------|--------------|--------------|--------------|
|                     | Dataset        | #Images |               |              |              |              |
| NLPR-PAL [19]       | CTDaR          | 0.6K    | S-A           | -            | -            | -            |
| DGCNN [9]           | CTDaR          | 0.6K    | S-A           | 0.704        | 0.649        | 0.675        |
| DGCNN [9]           | SciTSR         | 12.0K   | S-A           | 0.427        | 0.395        | 0.410        |
| DGCNN [9]           | CTDaR + SciTSR | 12.6K   | S-A           | 0.728        | 0.672        | 0.699        |
| TabStruct-Net (our) | CTDaR          | 0.6K    | S-A           | 0.729        | 0.667        | 0.697        |
| TabStruct-Net (our) | SciTSR         | 12.0K   | S-A           | 0.483        | 0.458        | 0.470        |
| TabStruct-Net (our) | CTDaR + SciTSR | 12.6K   | S-A           | <b>0.754</b> | <b>0.691</b> | <b>0.721</b> |

**Table 10.** Comparison of results for physical structure recognition on ICDAR-2019 (CTDaR) archival dataset. For comparison against DGCNN[9], we use the cell bounding boxes detected from Tabstruct-Net for a fair comparison. **P:** indicates precision, **R:** indicates recall, **F1:** indicates F1 Score and **#Images:** indicates number of table images in the training set. Tabstruct-Net is the **best performing model** on ICDAR-2019 CTDaR archival dataset in both **S-A** and **S-B**.

| Method              | Exp. Setup | P $\uparrow$ | R $\uparrow$ | F1 $\uparrow$ |
|---------------------|------------|--------------|--------------|---------------|
| DeepDesRT [7]       | S-A        | 0.469        | 0.426        | 0.446         |
| SPLERGE [10]        | S-A        | 0.748        | 0.709        | 0.728         |
| TabStruct-Net (our) | S-A        | <b>0.803</b> | <b>0.775</b> | <b>0.788</b>  |
| GraphTSR [14]       | S-B        | 0.727        | 0.744        | 0.735         |
| DGCNN* [9]          | S-B        | 0.887        | 0.858        | 0.872         |
| TabStruct-Net (our) | S-B        | <b>0.975</b> | <b>0.981</b> | <b>0.978</b>  |

**Table 11.** Comparison of results for physical structure recognition on UNLV-partial dataset. **P**: indicates precision, **R**: indicates recall, **F1**: indicates F1 Score. All models are trained on SciTSR and fine-tuned on UNLV-partial datasets. TabStruct-Net is the **best performing model** on UNLV-partial dataset in both **S-A** and **S-B**.

| Method              | Exp. Setup | Evaluation on |              |               |              |              |               |
|---------------------|------------|---------------|--------------|---------------|--------------|--------------|---------------|
|                     |            | SciTSR        |              |               | SciTSR-COMP  |              |               |
|                     |            | P $\uparrow$  | R $\uparrow$ | F1 $\uparrow$ | P $\uparrow$ | R $\uparrow$ | F1 $\uparrow$ |
| DeepDesRT [7]       | S-A        | 0.872         | 0.854        | 0.863         | 0.806        | 0.779        | 0.792         |
| SPLERGE [10]        | S-A        | 0.907         | 0.892        | 0.899         | 0.884        | 0.857        | 0.870         |
| TabStruct-Net (our) | S-A        | <b>0.910</b>  | <b>0.897</b> | <b>0.903</b>  | <b>0.889</b> | <b>0.864</b> | <b>0.876</b>  |
| GraphTSR [14]       | S-B        | 0.936         | 0.931        | 0.934         | 0.943        | 0.925        | 0.934         |
| DGCNN* [9]          | S-B        | 0.956         | 0.965        | 0.960         | 0.947        | 0.955        | 0.951         |
| Tabstruct-Net (our) | S-B        | <b>0.963</b>  | <b>0.977</b> | <b>0.970</b>  | <b>0.955</b> | <b>0.969</b> | <b>0.962</b>  |

**Table 12.** Comparison of results for physical structure recognition on SciTSR and SciTSR-COMP datasets. **P**: indicates precision, **R**: indicates recall, **F1**: indicates F1 Score. All the models are trained on SciTSR dataset. Tabstruct-Net is the **best performing model** on SciTSR and SciTSR-COMP datasets in both **S-A** and **S-B**.



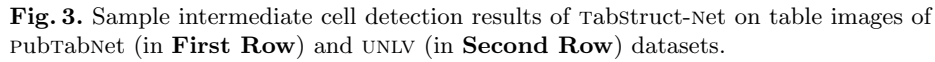

Figures 4-10 demonstrate some qualitative results of structure recognition on all the evaluation datasets. From the figures, it can be seen that our model is able to work in the presence of archival table images, multi row/column spanning cells, varied table layouts and multiple line spanning cells. This indicates the robustness of our method under multiple kind of table images.

|                    | number of franchisees |      | number of franchisees |        |
|--------------------|-----------------------|------|-----------------------|--------|
|                    | 1993                  | 1994 | 1993                  | 1994   |
| Austria            | 80                    | 170  | 2500                  | 2700   |
| Belgium/Luxembourg | 90                    | 135  | 3200                  | 2495   |
| Denmark            | 42                    | 42   | 500                   | 500    |
| Finland            | 500                   | 500  | 30000                 | 30000  |
| France             | 370                   | 420  | 15500                 | 18000  |
| Germany            | 370                   | 420  | 15500                 | 18000  |
| Ireland            | 20                    | 20   | 1000                  | 1000   |
| Italy              | 318                   | 361  | 16100                 | 17500  |
| Netherlands        | 331                   | 340  | 12640                 | 12120  |
| Portugal           | 55                    | 70   | 1000                  | 1000   |
| Spain              | 117                   | 250  | 14500                 | 20000  |
| Sweden             | 200                   | 200  | 900                   | 900    |
| UK                 | 373                   | 396  | 18100                 | 24900  |
| EU Total           | 2496                  | 2884 | 113940                | 129115 |

  

|                    | number of franchisees |      | number of franchisees |        |
|--------------------|-----------------------|------|-----------------------|--------|
|                    | 1993                  | 1994 | 1993                  | 1994   |
| Austria            | 80                    | 170  | 2500                  | 2700   |
| Belgium/Luxembourg | 90                    | 135  | 3200                  | 2495   |
| Denmark            | 42                    | 42   | 500                   | 500    |
| Finland            | 500                   | 500  | 30000                 | 30000  |
| France             | 370                   | 420  | 15500                 | 18000  |
| Germany            | 370                   | 420  | 15500                 | 18000  |
| Ireland            | 20                    | 20   | 1000                  | 1000   |
| Italy              | 318                   | 361  | 16100                 | 17500  |
| Netherlands        | 331                   | 340  | 12640                 | 12120  |
| Portugal           | 55                    | 70   | 1000                  | 1000   |
| Spain              | 117                   | 250  | 14500                 | 20000  |
| Sweden             | 200                   | 200  | 900                   | 900    |
| UK                 | 373                   | 396  | 18100                 | 24900  |
| EU Total           | 2496                  | 2884 | 113940                | 129115 |

  

| Faculty cluster | Female students |              |
|-----------------|-----------------|--------------|
|                 | Sample          | Population   |
| Sciences        | 63 (18.5%)      | 587 (16.4%)  |
| Social Sciences | 189 (55.6%)     | 2075 (57.0%) |
| Humanities      | 77 (22.6%)      | 755 (20.7%)  |
| Civil Sciences  | 11 (3.2%)       | 213 (5.9%)   |
| Total           | 340             | 3640         |

  

| Cost Category  | Total Costs<br>€1,000,000 | Subsidies<br>€1,000,000 | Total Net<br>Costs<br>€0 | Federal<br>Program<br>€0 | Non-Federal<br>Programs<br>€0 |
|----------------|---------------------------|-------------------------|--------------------------|--------------------------|-------------------------------|
| Salaries       | 1,000,000                 | 1,000,000               | 0                        | 0                        | 0                             |
| Salaries (1)   | 1,000,000                 | 1,000,000               | 0                        | 0                        | 0                             |
| Salaries (2)   | 1,000,000                 | 1,000,000               | 0                        | 0                        | 0                             |
| Salaries (3)   | 1,000,000                 | 1,000,000               | 0                        | 0                        | 0                             |
| Salaries (4)   | 1,000,000                 | 1,000,000               | 0                        | 0                        | 0                             |
| Salaries (5)   | 1,000,000                 | 1,000,000               | 0                        | 0                        | 0                             |
| Salaries (6)   | 1,000,000                 | 1,000,000               | 0                        | 0                        | 0                             |
| Salaries (7)   | 1,000,000                 | 1,000,000               | 0                        | 0                        | 0                             |
| Salaries (8)   | 1,000,000                 | 1,000,000               | 0                        | 0                        | 0                             |
| Salaries (9)   | 1,000,000                 | 1,000,000               | 0                        | 0                        | 0                             |
| Salaries (10)  | 1,000,000                 | 1,000,000               | 0                        | 0                        | 0                             |
| Salaries (11)  | 1,000,000                 | 1,000,000               | 0                        | 0                        | 0                             |
| Salaries (12)  | 1,000,000                 | 1,000,000               | 0                        | 0                        | 0                             |
| Salaries (13)  | 1,000,000                 | 1,000,000               | 0                        | 0                        | 0                             |
| Salaries (14)  | 1,000,000                 | 1,000,000               | 0                        | 0                        | 0                             |
| Salaries (15)  | 1,000,000                 | 1,000,000               | 0                        | 0                        | 0                             |
| Salaries (16)  | 1,000,000                 | 1,000,000               | 0                        | 0                        | 0                             |
| Salaries (17)  | 1,000,000                 | 1,000,000               | 0                        | 0                        | 0                             |
| Salaries (18)  | 1,000,000                 | 1,000,000               | 0                        | 0                        | 0                             |
| Salaries (19)  | 1,000,000                 | 1,000,000               | 0                        | 0                        | 0                             |
| Salaries (20)  | 1,000,000                 | 1,000,000               | 0                        | 0                        | 0                             |
| Salaries (21)  | 1,000,000                 | 1,000,000               | 0                        | 0                        | 0                             |
| Salaries (22)  | 1,000,000                 | 1,000,000               | 0                        | 0                        | 0                             |
| Salaries (23)  | 1,000,000                 | 1,000,000               | 0                        | 0                        | 0                             |
| Salaries (24)  | 1,000,000                 | 1,000,000               | 0                        | 0                        | 0                             |
| Salaries (25)  | 1,000,000                 | 1,000,000               | 0                        | 0                        | 0                             |
| Salaries (26)  | 1,000,000                 | 1,000,000               | 0                        | 0                        | 0                             |
| Salaries (27)  | 1,000,000                 | 1,000,000               | 0                        | 0                        | 0                             |
| Salaries (28)  | 1,000,000                 | 1,000,000               | 0                        | 0                        | 0                             |
| Salaries (29)  | 1,000,000                 | 1,000,000               | 0                        | 0                        | 0                             |
| Salaries (30)  | 1,000,000                 | 1,000,000               | 0                        | 0                        | 0                             |
| Salaries (31)  | 1,000,000                 | 1,000,000               | 0                        | 0                        | 0                             |
| Salaries (32)  | 1,000,000                 | 1,000,000               | 0                        | 0                        | 0                             |
| Salaries (33)  | 1,000,000                 | 1,000,000               | 0                        | 0                        | 0                             |
| Salaries (34)  | 1,000,000                 | 1,000,000               | 0                        | 0                        | 0                             |
| Salaries (35)  | 1,000,000                 | 1,000,000               | 0                        | 0                        | 0                             |
| Salaries (36)  | 1,000,000                 | 1,000,000               | 0                        | 0                        | 0                             |
| Salaries (37)  | 1,000,000                 | 1,000,000               | 0                        | 0                        | 0                             |
| Salaries (38)  | 1,000,000                 | 1,000,000               | 0                        | 0                        | 0                             |
| Salaries (39)  | 1,000,000                 | 1,000,000               | 0                        | 0                        | 0                             |
| Salaries (40)  | 1,000,000                 | 1,000,000               | 0                        | 0                        | 0                             |
| Salaries (41)  | 1,000,000                 | 1,000,000               | 0                        | 0                        | 0                             |
| Salaries (42)  | 1,000,000                 | 1,000,000               | 0                        | 0                        | 0                             |
| Salaries (43)  | 1,000,000                 | 1,000,000               | 0                        | 0                        | 0                             |
| Salaries (44)  | 1,000,000                 | 1,000,000               | 0                        | 0                        | 0                             |
| Salaries (45)  | 1,000,000                 | 1,000,000               | 0                        | 0                        | 0                             |
| Salaries (46)  | 1,000,000                 | 1,000,000               | 0                        | 0                        | 0                             |
| Salaries (47)  | 1,000,000                 | 1,000,000               | 0                        | 0                        | 0                             |
| Salaries (48)  | 1,000,000                 | 1,000,000               | 0                        | 0                        | 0                             |
| Salaries (49)  | 1,000,000                 | 1,000,000               | 0                        | 0                        | 0                             |
| Salaries (50)  | 1,000,000                 | 1,000,000               | 0                        | 0                        | 0                             |
| Salaries (51)  | 1,000,000                 | 1,000,000               | 0                        | 0                        | 0                             |
| Salaries (52)  | 1,000,000                 | 1,000,000               | 0                        | 0                        | 0                             |
| Salaries (53)  | 1,000,000                 | 1,000,000               | 0                        | 0                        | 0                             |
| Salaries (54)  | 1,000,000                 | 1,000,000               | 0                        | 0                        | 0                             |
| Salaries (55)  | 1,000,000                 | 1,000,000               | 0                        | 0                        | 0                             |
| Salaries (56)  | 1,000,000                 | 1,000,000               | 0                        | 0                        | 0                             |
| Salaries (57)  | 1,000,000                 | 1,000,000               | 0                        | 0                        | 0                             |
| Salaries (58)  | 1,000,000                 | 1,000,000               | 0                        | 0                        | 0                             |
| Salaries (59)  | 1,000,000                 | 1,000,000               | 0                        | 0                        | 0                             |
| Salaries (60)  | 1,000,000                 | 1,000,000               | 0                        | 0                        | 0                             |
| Salaries (61)  | 1,000,000                 | 1,000,000               | 0                        | 0                        | 0                             |
| Salaries (62)  | 1,000,000                 | 1,000,000               | 0                        | 0                        | 0                             |
| Salaries (63)  | 1,000,000                 | 1,000,000               | 0                        | 0                        | 0                             |
| Salaries (64)  | 1,000,000                 | 1,000,000               | 0                        | 0                        | 0                             |
| Salaries (65)  | 1,000,000                 | 1,000,000               | 0                        | 0                        | 0                             |
| Salaries (66)  | 1,000,000                 | 1,000,000               | 0                        | 0                        | 0                             |
| Salaries (67)  | 1,000,000                 | 1,000,000               | 0                        | 0                        | 0                             |
| Salaries (68)  | 1,000,000                 | 1,000,000               | 0                        | 0                        | 0                             |
| Salaries (69)  | 1,000,000                 | 1,000,000               | 0                        | 0                        | 0                             |
| Salaries (70)  | 1,000,000                 | 1,000,000               | 0                        | 0                        | 0                             |
| Salaries (71)  | 1,000,000                 | 1,000,000               | 0                        | 0                        | 0                             |
| Salaries (72)  | 1,000,000                 | 1,000,000               | 0                        | 0                        | 0                             |
| Salaries (73)  | 1,000,000                 | 1,000,000               | 0                        | 0                        | 0                             |
| Salaries (74)  | 1,000,000                 | 1,000,000               | 0                        | 0                        | 0                             |
| Salaries (75)  | 1,000,000                 | 1,000,000               | 0                        | 0                        | 0                             |
| Salaries (76)  | 1,000,000                 | 1,000,000               | 0                        | 0                        | 0                             |
| Salaries (77)  | 1,000,000                 | 1,000,000               | 0                        | 0                        | 0                             |
| Salaries (78)  | 1,000,000                 | 1,000,000               | 0                        | 0                        | 0                             |
| Salaries (79)  | 1,000,000                 | 1,000,000               | 0                        | 0                        | 0                             |
| Salaries (80)  | 1,000,000                 | 1,000,000               | 0                        | 0                        | 0                             |
| Salaries (81)  | 1,000,000                 | 1,000,000               | 0                        | 0                        | 0                             |
| Salaries (82)  | 1,000,000                 | 1,000,000               | 0                        | 0                        | 0                             |
| Salaries (83)  | 1,000,000                 | 1,000,000               | 0                        | 0                        | 0                             |
| Salaries (84)  | 1,000,000                 | 1,000,000               | 0                        | 0                        | 0                             |
| Salaries (85)  | 1,000,000                 | 1,000,000               | 0                        | 0                        | 0                             |
| Salaries (86)  | 1,000,000                 | 1,000,000               | 0                        | 0                        | 0                             |
| Salaries (87)  | 1,000,000                 | 1,000,000               | 0                        | 0                        | 0                             |
| Salaries (88)  | 1,000,000                 | 1,000,000               | 0                        | 0                        | 0                             |
| Salaries (89)  | 1,000,000                 | 1,000,000               | 0                        | 0                        | 0                             |
| Salaries (90)  | 1,000,000                 | 1,000,000               | 0                        | 0                        | 0                             |
| Salaries (91)  | 1,000,000                 | 1,000,000               | 0                        | 0                        | 0                             |
| Salaries (92)  | 1,000,000                 | 1,000,000               | 0                        | 0                        | 0                             |
| Salaries (93)  | 1,000,000                 | 1,000,000               | 0                        | 0                        | 0                             |
| Salaries (94)  | 1,000,000                 | 1,000,000               | 0                        | 0                        | 0                             |
| Salaries (95)  | 1,000,000                 | 1,000,000               | 0                        | 0                        | 0                             |
| Salaries (96)  | 1,000,000                 | 1,000,000               | 0                        | 0                        | 0                             |
| Salaries (97)  | 1,000,000                 | 1,000,000               | 0                        | 0                        | 0                             |
| Salaries (98)  | 1,000,000                 | 1,000,000               | 0                        | 0                        | 0                             |
| Salaries (99)  | 1,000,000                 | 1,000,000               | 0                        | 0                        | 0                             |
| Salaries (100) | 1,000,000                 | 1,000,000               | 0                        | 0                        | 0                             |

**Fig. 4.** Sample structure recognition output of Tabstruct-Net on table images of ICDAR-2013 dataset. **First Row:** prediction of cells which belong to the same row. **Second Row:** prediction of cells which belong to the same column. Cells marked with orange colour represent the examine cells and cells marked with green colour represent those which belong to the same row/column of the examined cell.

**Fig. 5.** Sample structure recognition output of Tabstruct-Net on table images of ICDAR-2019 dataset. **First Row:** prediction of cells which belong to the same row. **Second Row:** prediction of cells which belong to the same column. Cells marked with orange colour represent the examine cells and cells marked with green colour represent those which belong to the same row/column of the examined cell.

**Fig. 6.** Sample structure recognition output of Tabstruct-Net on table images of scitSR dataset. **First Row:** prediction of cells which belong to the same row. **Second Row:** prediction of cells which belong to the same column. Cells marked with orange colour represent the examine cells and cells marked with green colour represent those which belong to the same row/column of the examined cell.

**Fig. 7.** Sample structure recognition output of Tabstruct-Net on table images of scitSR-COMP dataset. **First Row:** prediction of cells which belong to the same row. **Second Row:** prediction of cells which belong to the same column. Cells marked with orange colour represent the examine cells and cells marked with green colour represent those which belong to the same row/column of the examined cell.



[illegible]

**Fig. 8.** Sample structure recognition output of TabStruct-Net on table images of TableBank dataset. **First Row:** prediction of cells which belong to the same row. **Second Row:** prediction of cells which belong to the same column. Cells marked with orange colour represent the examine cells and cells marked with green colour represent those which belong to the same row/column of the examined cell.

[illegible]

**Fig. 9.** Sample structure recognition output of Tabstruct-Net on table images of PubTabNet dataset. **First Row:** prediction of cells which belong to the same row. **Second Row:** prediction of cells which belong to the same column. Cells marked with orange colour represent the examine cells and cells marked with green colour represent those which belong to the same row/column of the examined cell.



**First Row:** Prediction of cells which belong to the same row. The table image shows financial data for UNLV. The first row is highlighted in orange, and the second row is highlighted in green. The third row is highlighted in orange, and the fourth row is highlighted in green. The fifth row is highlighted in orange, and the sixth row is highlighted in green. The seventh row is highlighted in orange, and the eighth row is highlighted in green. The ninth row is highlighted in orange, and the tenth row is highlighted in green. The eleventh row is highlighted in orange, and the twelfth row is highlighted in green. The thirteenth row is highlighted in orange, and the fourteenth row is highlighted in green. The fifteenth row is highlighted in orange, and the sixteenth row is highlighted in green. The seventeenth row is highlighted in orange, and the eighteenth row is highlighted in green. The nineteenth row is highlighted in orange, and the twentieth row is highlighted in green. The twenty-first row is highlighted in orange, and the twenty-second row is highlighted in green. The twenty-third row is highlighted in orange, and the twenty-fourth row is highlighted in green. The twenty-fifth row is highlighted in orange, and the twenty-sixth row is highlighted in green. The twenty-seventh row is highlighted in orange, and the twenty-eighth row is highlighted in green. The twenty-ninth row is highlighted in orange, and the thirtieth row is highlighted in green. The thirty-first row is highlighted in orange, and the thirty-second row is highlighted in green. The thirty-third row is highlighted in orange, and the thirty-fourth row is highlighted in green. The thirty-fifth row is highlighted in orange, and the thirty-sixth row is highlighted in green. The thirty-seventh row is highlighted in orange, and the thirty-eighth row is highlighted in green. The thirty-ninth row is highlighted in orange, and the fortieth row is highlighted in green. The forty-first row is highlighted in orange, and the forty-second row is highlighted in green. The forty-third row is highlighted in orange, and the forty-fourth row is highlighted in green. The forty-fifth row is highlighted in orange, and the forty-sixth row is highlighted in green. The forty-seventh row is highlighted in orange, and the forty-eighth row is highlighted in green. The forty-ninth row is highlighted in orange, and the fiftieth row is highlighted in green. The fifty-first row is highlighted in orange, and the fifty-second row is highlighted in green. The fifty-third row is highlighted in orange, and the fifty-fourth row is highlighted in green. The fifty-fifth row is highlighted in orange, and the fifty-sixth row is highlighted in green. The fifty-seventh row is highlighted in orange, and the fifty-eighth row is highlighted in green. The fifty-ninth row is highlighted in orange, and the sixtieth row is highlighted in green. The sixty-first row is highlighted in orange, and the sixty-second row is highlighted in green. The sixty-third row is highlighted in orange, and the sixty-fourth row is highlighted in green. The sixty-fifth row is highlighted in orange, and the sixty-sixth row is highlighted in green. The sixty-seventh row is highlighted in orange, and the sixty-eighth row is highlighted in green. The sixty-ninth row is highlighted in orange, and the seventieth row is highlighted in green. The seventy-first row is highlighted in orange, and the seventy-second row is highlighted in green. The seventy-third row is highlighted in orange, and the seventy-fourth row is highlighted in green. The seventy-fifth row is highlighted in orange, and the seventy-sixth row is highlighted in green. The seventy-seventh row is highlighted in orange, and the seventy-eighth row is highlighted in green. The seventy-ninth row is highlighted in orange, and the eightieth row is highlighted in green. The eighty-first row is highlighted in orange, and the eighty-second row is highlighted in green. The eighty-third row is highlighted in orange, and the eighty-fourth row is highlighted in green. The eighty-fifth row is highlighted in orange, and the eighty-sixth row is highlighted in green. The eighty-seventh row is highlighted in orange, and the eighty-eighth row is highlighted in green. The eighty-ninth row is highlighted in orange, and the ninetieth row is highlighted in green. The ninety-first row is highlighted in orange, and the ninety-second row is highlighted in green. The ninety-third row is highlighted in orange, and the ninety-fourth row is highlighted in green. The ninety-fifth row is highlighted in orange, and the ninety-sixth row is highlighted in green. The ninety-seventh row is highlighted in orange, and the ninety-eighth row is highlighted in green. The ninety-ninth row is highlighted in orange, and the one hundredth row is highlighted in green.

**Second Row:** Prediction of cells which belong to the same column. The table image shows financial data for UNLV. The first column is highlighted in orange, and the second column is highlighted in green. The third column is highlighted in orange, and the fourth column is highlighted in green. The fifth column is highlighted in orange, and the sixth column is highlighted in green. The seventh column is highlighted in orange, and the eighth column is highlighted in green. The ninth column is highlighted in orange, and the tenth column is highlighted in green. The eleventh column is highlighted in orange, and the twelfth column is highlighted in green. The thirteenth column is highlighted in orange, and the fourteenth column is highlighted in green. The fifteenth column is highlighted in orange, and the sixteenth column is highlighted in green. The seventeenth column is highlighted in orange, and the eighteenth column is highlighted in green. The nineteenth column is highlighted in orange, and the twentieth column is highlighted in green. The twenty-first column is highlighted in orange, and the twenty-second column is highlighted in green. The twenty-third column is highlighted in orange, and the twenty-fourth column is highlighted in green. The twenty-fifth column is highlighted in orange, and the twenty-sixth column is highlighted in green. The twenty-seventh column is highlighted in orange, and the twenty-eighth column is highlighted in green. The twenty-ninth column is highlighted in orange, and the thirtieth column is highlighted in green. The thirty-first column is highlighted in orange, and the thirty-second column is highlighted in green. The thirty-third column is highlighted in orange, and the thirty-fourth column is highlighted in green. The thirty-fifth column is highlighted in orange, and the thirty-sixth column is highlighted in green. The thirty-seventh column is highlighted in orange, and the thirty-eighth column is highlighted in green. The thirty-ninth column is highlighted in orange, and the fortieth column is highlighted in green. The forty-first column is highlighted in orange, and the forty-second column is highlighted in green. The forty-third column is highlighted in orange, and the forty-fourth column is highlighted in green. The forty-fifth column is highlighted in orange, and the forty-sixth column is highlighted in green. The forty-seventh column is highlighted in orange, and the forty-eighth column is highlighted in green. The forty-ninth column is highlighted in orange, and the fiftieth column is highlighted in green. The fifty-first column is highlighted in orange, and the fifty-second column is highlighted in green. The fifty-third column is highlighted in orange, and the fifty-fourth column is highlighted in green. The fifty-fifth column is highlighted in orange, and the fifty-sixth column is highlighted in green. The fifty-seventh column is highlighted in orange, and the fifty-eighth column is highlighted in green. The fifty-ninth column is highlighted in orange, and the sixtieth column is highlighted in green. The sixty-first column is highlighted in orange, and the sixty-second column is highlighted in green. The sixty-third column is highlighted in orange, and the sixty-fourth column is highlighted in green. The sixty-fifth column is highlighted in orange, and the sixty-sixth column is highlighted in green. The sixty-seventh column is highlighted in orange, and the sixty-eighth column is highlighted in green. The sixty-ninth column is highlighted in orange, and the seventieth column is highlighted in green. The seventy-first column is highlighted in orange, and the seventy-second column is highlighted in green. The seventy-third column is highlighted in orange, and the seventy-fourth column is highlighted in green. The seventy-fifth column is highlighted in orange, and the seventy-sixth column is highlighted in green. The seventy-seventh column is highlighted in orange, and the seventy-eighth column is highlighted in green. The seventy-ninth column is highlighted in orange, and the eightieth column is highlighted in green. The eighty-first column is highlighted in orange, and the eighty-second column is highlighted in green. The eighty-third column is highlighted in orange, and the eighty-fourth column is highlighted in green. The eighty-fifth column is highlighted in orange, and the eighty-sixth column is highlighted in green. The eighty-seventh column is highlighted in orange, and the eighty-eighth column is highlighted in green. The eighty-ninth column is highlighted in orange, and the ninetieth column is highlighted in green. The ninety-first column is highlighted in orange, and the ninety-second column is highlighted in green. The ninety-third column is highlighted in orange, and the ninety-fourth column is highlighted in green. The ninety-fifth column is highlighted in orange, and the ninety-sixth column is highlighted in green. The ninety-seventh column is highlighted in orange, and the ninety-eighth column is highlighted in green. The ninety-ninth column is highlighted in orange, and the one hundredth column is highlighted in green.

**Fig. 10.** Sample structure recognition output of Tabstruct-Net on table images of UNLV dataset. **First Row:** prediction of cells which belong to the same row. **Second Row:** prediction of cells which belong to the same column. Cells marked with orange colour represent the examine cells and cells marked with green colour represent those which belong to the same row/column of the examined cell.

#### 4.6 Failure Examples

Figure 11 shows some failure cases of our model in presence of empty spaces along both horizontal and vertical axes.

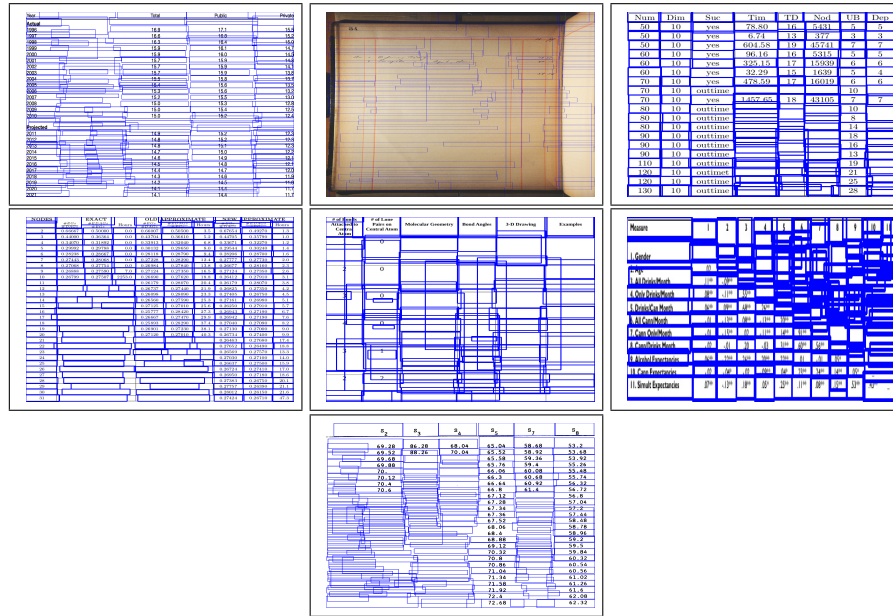

**Fig. 11.** Sample intermediate cell detection results of Tabstruct-Net on table images of ICDAR-2013, ICDAR-2019 CTDaR, SciTSR, SciTSR-COMP, TableBank, PubTabNet and UNLV datasets illustrate failure of Tabstruct-Net.

## 4.7 Robustness of TabStruct-Net

| CD Network          | SR Network    | IoU<br>TH | CD Scores    |              |              | SR Scores    |              |              |
|---------------------|---------------|-----------|--------------|--------------|--------------|--------------|--------------|--------------|
|                     |               |           | P↑           | R↑           | F1↑          | P↑           | R↑           | F1↑          |
| Mask R-CNN+TD+BU+AL | DGCNN+P2+LSTM | 0.5       | <b>0.942</b> | <b>0.948</b> | <b>0.945</b> | <b>0.933</b> | <b>0.915</b> | <b>0.924</b> |
|                     |               | 0.6       | 0.937        | 0.941        | 0.939        | 0.930        | 0.908        | 0.919        |
|                     |               | 0.7       | 0.828        | 0.831        | 0.829        | 0.800        | 0.791        | 0.795        |
|                     |               | 0.8       | 0.651        | 0.670        | 0.660        | 0.638        | 0.624        | 0.631        |
|                     |               | 0.9       | 0.314        | 0.336        | 0.325        | 0.291        | 0.284        | 0.287        |

**Table 13.** Physical structure recognition results on ICDAR-2013-partial dataset for varying IoU thresholds to demonstrate TabStruct-Net’s robustness. **ES:** indicates Experimental Setup, **CD:** indicates Cell Detection, **TH:** indicates IoU threshold value, **SR:** indicates Structure Recognition, **P2:** indicates using visual features from P2 layer of the FPN instead of using separate convolution blocks, **LSTM:** indicates use of LSTMs to model visual features along center-horizontal and center-vertical lines for every cell, **TD+BU:** indicates use of Top-Down and Bottom-Up pathways in the FPN, **AL:** indicates addition of alignment loss as a regularizer to Tabstruct-Net, **P:** indicates precision, **R:** indicates recall, **F1:** indicates F1 Score.

| CD Network          | SR Network    | IoU<br>TH | CD Scores    |              |               | SR Scores    |              |               |
|---------------------|---------------|-----------|--------------|--------------|---------------|--------------|--------------|---------------|
|                     |               |           | P $\uparrow$ | R $\uparrow$ | F1 $\uparrow$ | P $\uparrow$ | R $\uparrow$ | F1 $\uparrow$ |
| Mask R-CNN+TD+BU+AL | DGCNN+P2+LSTM | 0.5       | <b>0.865</b> | <b>0.857</b> | <b>0.861</b>  | <b>0.864</b> | <b>0.842</b> | <b>0.853</b>  |
|                     |               | 0.6       | 0.84         | 0.836        | 0.838         | 0.822        | 0.787        | 0.804         |
|                     |               | 0.7       | 0.694        | 0.681        | 0.687         | 0.641        | 0.625        | 0.633         |
|                     |               | 0.8       | 0.454        | 0.428        | 0.441         | 0.404        | 0.376        | 0.389         |
|                     |               | 0.9       | 0.201        | 0.153        | 0.174         | 0.175        | 0.138        | 0.154         |

**Table 14.** Physical structure recognition results on ICDAR-2019 dataset for varying IoU thresholds to demonstrate TabStruct-Net’s robustness. **ES:** indicates Experimental Setup, **CD:** indicates Cell Detection, **TH:** indicates IoU threshold value, **SR:** indicates Structure Recognition, **P2:** indicates using visual features from P2 layer of the FPN instead of using separate convolution blocks, **LSTM:** indicates use of LSTMs to model visual features along center-horizontal and center-vertical lines for every cell, **TD+BU:** indicates use of Top-Down and Bottom-Up pathways in the FPN, **AL:** indicates addition of alignment loss as a regularizer to TabStruct-Net, **P:** indicates precision, **R:** indicates recall, **F1:** indicates F1 Score.

| CD Network          | SR Network    | IoU<br>TH | CD Scores    |              |               | SR Scores    |              |               |
|---------------------|---------------|-----------|--------------|--------------|---------------|--------------|--------------|---------------|
|                     |               |           | P $\uparrow$ | R $\uparrow$ | F1 $\uparrow$ | P $\uparrow$ | R $\uparrow$ | F1 $\uparrow$ |
| Mask R-CNN+TD+BU+AL | DGCNN+P2+LSTM | 0.5       | <b>0.871</b> | <b>0.879</b> | <b>0.875</b>  | <b>0.864</b> | <b>0.842</b> | <b>0.853</b>  |
|                     |               | 0.6       | 0.858        | 0.864        | 0.861         | 0.849        | 0.828        | 0.839         |
|                     |               | 0.7       | 0.751        | 0.773        | 0.762         | 0.735        | 0.711        | 0.723         |
|                     |               | 0.8       | 0.595        | 0.622        | 0.608         | 0.558        | 0.532        | 0.545         |
|                     |               | 0.9       | 0.214        | 0.237        | 0.225         | 0.173        | 0.148        | 0.160         |

**Table 15.** Physical structure recognition results on UNLV-partial dataset for varying IoU thresholds to demonstrate TabStruct-Net’s robustness. **ES:** indicates Experimental Setup, **CD:** indicates Cell Detection, **TH:** indicates IoU threshold value, **SR:** indicates Structure Recognition, **P2:** indicates using visual features from P2 layer of the FPN instead of using separate convolution blocks, **LSTM:** indicates use of LSTMs to model visual features along center-horizontal and center-vertical lines for every cell, **TD+BU:** indicates use of Top-Down and Bottom-Up pathways in the FPN, **AL:** indicates addition of alignment loss as a regularizer to TabStruct-Net, **P:** indicates precision, **R:** indicates recall, **F1:** indicates F1 Score.

| CD Network          | SR Network    | IoU | CD Scores    |              |              |               | SR Scores    |              |               |
|---------------------|---------------|-----|--------------|--------------|--------------|---------------|--------------|--------------|---------------|
|                     |               |     | TH           | P $\uparrow$ | R $\uparrow$ | F1 $\uparrow$ | P $\uparrow$ | R $\uparrow$ | F1 $\uparrow$ |
| Mask R-CNN+TD+BU+AL | DGCNN+P2+LSTM | 0.5 | <b>0.939</b> | <b>0.944</b> | <b>0.941</b> | <b>0.930</b>  | <b>0.922</b> | <b>0.926</b> |               |
|                     |               | 0.6 | 0.932        | 0.938        | 0.935        | 0.927         | 0.913        | 0.920        |               |
|                     |               | 0.7 | 0.808        | 0.820        | 0.814        | 0.793         | 0.775        | 0.784        |               |
|                     |               | 0.8 | 0.639        | 0.652        | 0.645        | 0.618         | 0.594        | 0.606        |               |
|                     |               | 0.9 | 0.297        | 0.324        | 0.310        | 0.271         | 0.258        | 0.264        |               |

**Table 16.** Physical structure recognition results on scITSR dataset for varying IoU thresholds to demonstrate Tabstruct-Net’s robustness. **ES:** indicates Experimental Setup, **CD:** indicates Cell Detection, **TH:** indicates IoU threshold value, **SR:** indicates Structure Recognition, **P2:** indicates using visual features from P2 layer of the FPN instead of using separate convolution blocks, **LSTM:** indicates use of LSTMs to model visual features along center-horizontal and center-vertical lines for every cell, **TD+BU:** indicates use of Top-Down and Bottom-Up pathways in the FPN, **AL:** indicates addition of alignment loss as a regularizer to Tabstruct-Net, **P:** indicates precision, **R:** indicates recall, **F1:** indicates F1 Score.

#### 4.8 Ablation Study

| ES  | CD Network          | SR Network    | CD Scores    |              |              | SR Scores    |              |              |
|-----|---------------------|---------------|--------------|--------------|--------------|--------------|--------------|--------------|
|     |                     |               | P↑           | R↑           | F1↑          | P↑           | R↑           | F1↑          |
| S-A | Mask R-CNN          | DGCNN         | 0.835        | 0.843        | 0.839        | 0.885        | 0.864        | 0.874        |
|     | Mask R-CNN          | DGCNN+P2      | 0.837        | 0.846        | 0.841        | 0.887        | 0.865        | 0.876        |
|     | Mask R-CNN          | DGCNN+P2+LSTM | 0.840        | 0.848        | 0.844        | 0.903        | 0.889        | 0.896        |
|     | Mask R-CNN+TD+BU    | DGCNN         | 0.898        | 0.900        | 0.899        | 0.889        | 0.882        | 0.885        |
|     | Mask R-CNN+TD+BU    | DGCNN+P2      | 0.902        | 0.905        | 0.903        | 0.893        | 0.885        | 0.889        |
|     | Mask R-CNN+TD+BU    | DGCNN+P2+LSTM | 0.924        | 0.928        | 0.926        | 0.911        | 0.896        | 0.903        |
|     | Mask R-CNN+TD+BU+AL | DGCNN         | 0.920        | 0.924        | 0.922        | 0.915        | 0.892        | 0.903        |
|     | Mask R-CNN+TD+BU+AL | DGCNN+P2      | 0.924        | 0.927        | 0.925        | 0.918        | 0.894        | 0.906        |
|     | Mask R-CNN+TD+BU+AL | DGCNN+P2+LSTM | <b>0.937</b> | <b>0.941</b> | <b>0.939</b> | <b>0.930</b> | <b>0.908</b> | <b>0.919</b> |
| S-B | -NA-                | DGCNN         | -NA-         | -NA-         | -NA-         | 0.986        | 0.990        | 0.988        |
|     | -NA-                | DGCNN+P2      | -NA-         | -NA-         | -NA-         | 0.987        | 0.990        | 0.989        |
|     | -NA-                | DGCNN+P2+LSTM | -NA-         | -NA-         | -NA-         | <b>0.991</b> | <b>0.993</b> | <b>0.992</b> |

**Table 17.** Ablation study for physical structure recognition on ICDAR-2013-partial dataset. **ES:** indicates Experimental Setup, **CD:** indicates Cell Detection, **SR:** indicates Structure Recognition, **P2:** indicates using visual features from P2 layer of the FPN instead of using separate convolution blocks, **LSTM:** indicates use of LSTMs to model visual features along center-horizontal and center-vertical lines for every cell, **TD+BU:** indicates use of Top-Down and Bottom-Up pathways in the FPN, **AL:** indicates addition of alignment loss as a regularizer to Tabstruct-Net, **P:** indicates precision, **R:** indicates recall, **F1:** indicates F1 Score.

| ES  | CD Network          | SR Network    | CD Scores    |              |              | SR Scores    |              |              |
|-----|---------------------|---------------|--------------|--------------|--------------|--------------|--------------|--------------|
|     |                     |               | P↑           | R↑           | F1↑          | P↑           | R↑           | F1↑          |
| S-A | Mask R-CNN          | DGCNN         | 0.770        | 0.752        | 0.761        | 0.744        | 0.706        | 0.725        |
|     | Mask R-CNN          | DGCNN+P2      | 0.774        | 0.761        | 0.767        | 0.751        | 0.718        | 0.734        |
|     | Mask R-CNN          | DGCNN+P2+LSTM | 0.797        | 0.785        | 0.791        | 0.775        | 0.750        | 0.762        |
|     | Mask R-CNN+TD+BU    | DGCNN         | 0.775        | 0.761        | 0.768        | 0.751        | 0.713        | 0.732        |
|     | Mask R-CNN+TD+BU    | DGCNN+P2      | 0.781        | 0.768        | 0.774        | 0.756        | 0.721        | 0.738        |
|     | Mask R-CNN+TD+BU    | DGCNN+P2+LSTM | 0.803        | 0.790        | 0.796        | 0.782        | 0.754        | 0.768        |
|     | Mask R-CNN+TD+BU+AL | DGCNN         | 0.821        | 0.814        | 0.817        | 0.797        | 0.748        | 0.772        |
|     | Mask R-CNN+TD+BU+AL | DGCNN+P2      | 0.823        | 0.818        | 0.820        | 0.800        | 0.753        | 0.776        |
|     | Mask R-CNN+TD+BU+AL | DGCNN+P2+LSTM | <b>0.840</b> | <b>0.836</b> | <b>0.838</b> | <b>0.822</b> | <b>0.787</b> | <b>0.804</b> |
| S-B | -NA-                | DGCNN         | -NA-         | -NA-         | -NA-         | 0.904        | 0.889        | 0.896        |
|     | -NA-                | DGCNN+P2      | -NA-         | -NA-         | -NA-         | 0.932        | 0.921        | 0.927        |
|     | -NA-                | DGCNN+P2+LSTM | -NA-         | -NA-         | -NA-         | <b>0.975</b> | <b>0.958</b> | <b>0.966</b> |

**Table 18.** Ablation study for physical structure recognition on ICDAR-2019 dataset. **ES:** indicates Experimental Setup, **CD:** indicates Cell Detection, **SR:** indicates Structure Recognition, **P2:** indicates using visual features from P2 layer of the FPN instead of using separate convolution blocks, **LSTM:** indicates use of LSTMs to model visual features along center-horizontal and center-vertical lines for every cell, **TD+BU:** indicates use of Top-Down and Bottom-Up pathways in the FPN, **AL:** indicates addition of alignment loss as a regularizer to Tabstruct-Net, **P:** indicates precision, **R:** indicates recall, **F1:** indicates F1 Score.

| ES  | CD Network          | SR Network    | CD Scores              |       |       | SR Scores              |       |       |
|-----|---------------------|---------------|------------------------|-------|-------|------------------------|-------|-------|
|     |                     |               | P↑                     | R↑    | F1↑   | P↑                     | R↑    | F1↑   |
| S-A | Mask R-CNN          | DGCNN         | 0.835                  | 0.843 | 0.839 | 0.795                  | 0.764 | 0.779 |
|     | Mask R-CNN          | DGCNN+P2      | 0.837                  | 0.846 | 0.841 | 0.812                  | 0.788 | 0.800 |
|     | Mask R-CNN          | DGCNN+P2+LSTM | 0.840                  | 0.848 | 0.844 | 0.838                  | 0.821 | 0.829 |
|     | Mask R-CNN+TD+BU    | DGCNN         | 0.837                  | 0.845 | 0.841 | 0.797                  | 0.766 | 0.781 |
|     | Mask R-CNN+TD+BU    | DGCNN+P2      | 0.840                  | 0.849 | 0.844 | 0.815                  | 0.790 | 0.802 |
|     | Mask R-CNN+TD+BU    | DGCNN+P2+LSTM | 0.844                  | 0.851 | 0.847 | 0.841                  | 0.823 | 0.832 |
|     | Mask R-CNN+TD+BU+AL | DGCNN         | 0.847                  | 0.855 | 0.851 | 0.802                  | 0.775 | 0.788 |
|     | Mask R-CNN+TD+BU+AL | DGCNN+P2      | 0.853                  | 0.860 | 0.856 | 0.823                  | 0.797 | 0.810 |
|     | Mask R-CNN+TD+BU+AL | DGCNN+P2+LSTM | <b>0.8580.8640.861</b> |       |       | <b>0.8490.8280.839</b> |       |       |
| S-B | -NA-                | DGCNN         | -NA-                   | -NA-  | -NA-  | 0.921                  | 0.898 | 0.909 |
|     | -NA-                | DGCNN+P2      | -NA-                   | -NA-  | -NA-  | 0.950                  | 0.935 | 0.942 |
|     | -NA-                | DGCNN+P2+LSTM | -NA-                   | -NA-  | -NA-  | <b>0.9920.9940.993</b> |       |       |

**Table 19.** Ablation study for physical structure recognition on UNLV-partial dataset. **ES:** indicates Experimental Setup, **CD:** indicates Cell Detection, **SR:** indicates Structure Recognition, **P2:** indicates using visual features from P2 layer of the FPN instead of using separate convolution blocks, **LSTM:** indicates use of LSTMs to model visual features along center-horizontal and center-vertical lines for every cell, **TD+BU:** indicates use of Top-Down and Bottom-Up pathways in the FPN, **AL:** indicates addition of alignment loss as a regularizer to Tabstruct-Net, **P:** indicates precision, **R:** indicates recall, **F1:** indicates F1 Score.

| ES  | CD Network          | SR Network    | CD Scores              |       |       | SR Scores              |       |       |
|-----|---------------------|---------------|------------------------|-------|-------|------------------------|-------|-------|
|     |                     |               | P↑                     | R↑    | F1↑   | P↑                     | R↑    | F1↑   |
| S-A | Mask R-CNN          | DGCNN         | 0.896                  | 0.900 | 0.898 | 0.888                  | 0.874 | 0.881 |
|     | Mask R-CNN          | DGCNN+P2      | 0.904                  | 0.907 | 0.905 | 0.892                  | 0.879 | 0.885 |
|     | Mask R-CNN          | DGCNN+P2+LSTM | 0.911                  | 0.915 | 0.913 | 0.903                  | 0.894 | 0.898 |
|     | Mask R-CNN+TD+BU    | DGCNN         | 0.901                  | 0.909 | 0.905 | 0.893                  | 0.880 | 0.886 |
|     | Mask R-CNN+TD+BU    | DGCNN+P2      | 0.905                  | 0.917 | 0.911 | 0.896                  | 0.882 | 0.889 |
|     | Mask R-CNN+TD+BU    | DGCNN+P2+LSTM | 0.918                  | 0.924 | 0.921 | 0.905                  | 0.898 | 0.902 |
|     | Mask R-CNN+TD+BU+AL | DGCNN         | 0.908                  | 0.919 | 0.913 | 0.908                  | 0.894 | 0.901 |
|     | Mask R-CNN+TD+BU+AL | DGCNN+P2      | 0.921                  | 0.926 | 0.923 | 0.913                  | 0.901 | 0.907 |
|     | Mask R-CNN+TD+BU+AL | DGCNN+P2+LSTM | <b>0.9320.9380.935</b> |       |       | <b>0.9270.9130.920</b> |       |       |
| S-B | -NA-                | DGCNN         | -NA-                   | -NA-  | -NA-  | 0.970                  | 0.981 | 0.976 |
|     | -NA-                | DGCNN+P2      | -NA-                   | -NA-  | -NA-  | 0.973                  | 0.986 | 0.979 |
|     | -NA-                | DGCNN+P2+LSTM | -NA-                   | -NA-  | -NA-  | <b>0.9890.9930.991</b> |       |       |

**Table 20.** Ablation study for physical structure recognition on sciTSR dataset. **ES:** indicates Experimental Setup, **CD:** indicates Cell Detection, **SR:** indicates Structure Recognition, **P2:** indicates using visual features from P2 layer of the FPN instead of using separate convolution blocks, **LSTM:** indicates use of LSTMs to model visual features along center-horizontal and center-vertical lines for every cell, **TD+BU:** indicates use of Top-Down and Bottom-Up pathways in the FPN, **AL:** indicates addition of alignment loss as a regularizer to Tabstruct-Net, **P:** indicates precision, **R:** indicates recall, **F1:** indicates F1 Score.
